# Supplementary material
Source: publisher site journal article supplement (https://www.dovepress.com/article/286913)
Supplement: Supplementary file 1 [file get_supplementary_file.php]

**Appendix Table 1**. Cytokines/Proteins and their proposed functions in APS in addition to the growth factors in PRP. * indicates data on file.

| **Name** | **Abbreviation** | **Proposed Function in APS** |
| --- | --- | --- |
| Interleukin-1 Receptor Antagonist | IL-1ra or IRAP | Anti-Inflammatory: Blocks IL-1 signaling1 |
| Soluble Interleukin-1 Receptor Antagonist | sIL-1R | Anti-Inflammatory: Blocks IL-1 signaling1 |
| Soluble Tumor Necrosis Factor Receptors | sTNF-R | Anti-Inflammatory: Blocks TNFα signaling1 |
| Alpha 2 Macroglobulin | A2M | Binds MMPs* |

**Appendix Table 2.** Raw data for L-PRP Devices used in this study. All follow-up was conducted between from February – March 2020.

| Date | Age | Sex | Injection Site(s) | Additional Notes and Medical History | Device # | Patient Number |
| --- | --- | --- | --- | --- | --- | --- |
| 10/27/2017 | 7y | N | L & R Stifle-3ml each joint | Bilateral ACL Sx 10/27/17- Doing well now after extensive PT after surgery | 1 | 1 |
| 6/2/2017 | 6y | N | Lumbosacral Area 5.8ml SQ | Rads= Lumbosacral stenosis Doing well owner loves the product | 2 | 2 |
| 08/05/2019 | 8y | N | Lumbosacral Area 6.9ml SQ | Rads= Lumbosacral stenosis Doing well owner loves the product | 3 | 2 |
| 01/30/2019 | 12y | N | Left Shoulder 6ml SQ | Bicipital Tendonitis- LM asking owner for update, no answer back | 4 | 3 |
| 12/08/2017 | 9y | N | Left Stifle SQ & joint 6ml | Left Luxating Patella-LM asking owner for update, no answer back | 5 | 4 |
| 09/10/2018 | 10y | N | Bilateral Stifles SQ 1.5ml each | Bilateral Luxating Patellas- LM asking owner for update, no answer back | 6 | 4 |
| 06/15/2018 | 22m | S | Right Bicipital Tendon SQ | Bicipital Tendonitis-LM asking owner for update, no answer back, no PRP amount | 7 | 5 |
| 05/09/2018 | 11y | N | R Elbow & Shoulder 4ml each | Arthritis 10ml PRP total- no improvement with SQ injections | 8 | 6 |
| 05/15/2017 | 8y | N | Lumbosacral Area 6.2ml SQ | Arthritis- no improvement with injections | 9 | 7 |
| 05/17/2017 | 5y | S | Left Carpus Area 3.4ml SQ | Carpal Pain- 6ml PRP total- no improvement with injection | 10 | 8 |
| 05/09/2018 | 18m | N | Right & Left Elbows 4ml each | Ununited AP Sx 03/18= Left 02/18= Right 8ml PRP total-mild improvement | 11 | 9 |
| 03/15/2018 | 11m | S | Bilateral Hips 3.0ml SQ each | Joint Laxity- 6ml PRP total | 12 | 10 |
| 03/16/2017 | 4y | F | Right Stifle- no amount | Luxating Patella-LM asking owner for update, no answer back | 13 | 11 |
| 01/07/2020 | 6y | N | Left Stifle SQ- no amount | Left Capsule thickening & DJD Left Stifle- Doing really well | 14 | 12 |
| 03/17/2017 | 4y | S | Bilateral Hip Area-no amount | FHO Left hip 5/15, Dislocated Right hip 3/17- no answer to get update | 15 | 13 |
| 10/02/2019 | 17m | N | Left Stifle 6ml SQ | Luxating Patella Sx 10/02/2019- Took ~ 3 months but doing well now | 16 | 14 |
| 01/11/2019 | 12y | S | L & R Carpus SQ 2ml each | Arthritis-minimal improvement, still needed to start NSAIDs | 17 | 15 |
| 05/01/2017 | 2y | N | Left Shoulder SQ- no amount | Left Bicipital Tendonitis- no improvement | 18 | 16 |
| 05/08/2017 | 11y | N | Lumbosacral Area 6.2ml SQ | Lumbosacral Stenosis- minimal improvement, still on NSAIDs | 19 | 17 |
| 10/17/2019 | 2y | N | Right & Left Stifle 1ml SQ each | Luxating Patella Sx on Right 10/17/2019- 5ml PRP total- Doing well | 20 | 18 |
| 12/13/2017 | 6m | N | Left Shoulder 3.5ml SQ | OCD Lesion, OCD Sx on 01/25/2018, Doing well | 21 | 19 |
| 10/27/2017 | 3y | M | L Elbow 2.5ml, L shoulder 3.5ml | Elbow rads= Arthritis & Ununited AP, Shoulder= Bicipital Tendonitis Doing well | 22 | 20 |
| 10/17/2019 | 12y | M | Lhip 3ml,Rhip 2.5ml,Rstifle .5ml | Hip rads= arthritis Right Stifle= torn collateral ligament Doing well on NSAIDs | 23 | 21 |
| 03/20/2017 | 11y | S | Lumbosacral Area SQ | Lumbosacral Stenosis- no PRP amount, improved but still needs NSAIDs | 24 | 22 |
| 10/10/2019 | 6m | S | LShoulder 4ml,RShoulder 2.5ml | OCD Lesion, OCD L Sx on 10/10/19, OCD in R also Doing well | 25 | 23 |
| 05/01/2017 | 5y | S | Lumbosacral Area 6ml SQ | Lumbosacral Stenosis- Doing well | 26 | 24 |
| 05/08/2018 | 6y | M | Left Achilles Tendon Area 7ml | Lacerated Left Achilles Tendon- PRP and Splint - Doing well | 27 | 25 |
| 10/16/2017 | 9y | S | L Shoulder joint 1ml, 4.8ml SQ | Left Shoulder Arthritis and Bicipital Tendonitis -minimal improvement, on NSAIDs | 28 | 26 |
| 05/22/2017 | 8y | S | Bilateral Stifles- no amount | Arthritis- Did well, stayed on NSAIDs | 29 | 27 |
| 04/10/2017 | 6y | N | LStifle Joint 3ml, RStifle 3ml SQ | R Stifle= Luxating Patella, L Stifle= ACL Sx 04/10/2017 Doing well no NSAIDs | 30 | 28 |
| 11/18/2019 | 9y | N | Right Shoulder Joint 7ml SQ | Right OCD Surgery- slowly improved to normal | 31 | 29 |
| 05/15/2018 | 5y | N | Ilioposas Area 3ml SQ | Hip Pain- minimal improvement | 32 | 30 |
| 10/02/2017 | 10y | S | Lumbosacral Spine 6ml SQ | Lumbosacral Stenosis- moderate improvement | 33 | 31 |
| 11/13/2017 | 10y | S | Bilateral Stifles 3.75ml SQ each | Right ACL Surgery - Doing well | 34 | 32 |
| 01/23/2017 | 6y | S | Bilateral Stifles 3.5ml SQ each | Bilateral Luxating Patellas- Doing well | 35 | 33 |
| 03/30/2018 | 7y | S | Bilateral Stifles 3.5ml SQ each | Bilateral Luxating Patellas- Doing well | 36 | 33 |
| 06/20/2016 | 6y | S | Left Tarsus 7ml SQ | Tarsus Pain- no improvement | 37 | 34 |
| 03/03/2017 | 8y | S | Right Stifle 3ml SQ, 3ml joint | Right Torn ACL- Doing well | 38 | 35 |

Appendix Table 3. Raw data for L-PRP Devices used in this study. All follow-up was conducted between from February – March 2020.

| Date | Age | Sex | Injection Site(s) | Additional Notes and Medical History | Device # | Patient Number |
| --- | --- | --- | --- | --- | --- | --- |
| 06/05/2019 | 10y | S | Right Hip 1.3ml, Left Hip 1.2ml | Arthritis- Doing well | 1 | 1 |
| 06/05/2017 | 4y | S | Right Stifle- no amount | ACL Surgery Right stifle- Did well | 2 | 2 |
| 12/26/2019 | 3y | S | Right Stifle 1ml, Left Stifle .5ml | Right ACL Surgery- Did well/ Left ACL was torn on 2/5/2020 | 3 | 3 |
| 11/14/2016 | 3y | S | Bilateral Hips 1.2ml each | Bilateral Hip Dysplasia- Did well | 4 | 4 |
| 05/26/2017 | 4y | S | Bilateral Hips 1.5ml each | Bilateral Hip Dysplasia- Did well | 5 | 4 |
| 10/10/2019 | 13y | S | Bilateral Stifles-no amount | Arthritis- Doing well | 6 | 5 |
| 06/12/2017 | 7y | N | Left Stifle 0.9ml | Arthritis/Post ACL Sx 1 yr favoring- Doing Great | 7 | 6 |
| 12/01/2017 | 17m | S | Bilateral Hip 1.5ml each | Bilateral Hip Dysplasia- Did well, no NSAIDs needed | 8 | 7 |
| 02/15/2019 | 9y | S | Left Stifle 1ml,Right Stifle 1.2ml | Left ACL Repair Sx- Doing well | 9 | 8 |
| 03/25/2016 | 7y | N | Bilateral Stifles 1ml each | 2/17/17 :Left ACL Torn- Doing well | 10 | 9 |
| 01/06/2020 | 4y | S | Bilateral Stifles- no amount | ACL Surgery Right stifle- Did well | 11 | 10 |
| 08/07/2019 | 4y | N | Bilateral Hips 1.2ml each | Bilateral Hip Dysplasia- Doing well | 12 | 11 |
| 09/18/2019 | 4y | N | Right Stifle 1.1ml,Left Stifle 1ml | TPLO Surgery Right Stifle, Doing well | 13 | 11 |
| 08/24/2017 | 11y | N | Bilateral Stifles 1ml each | Arthritis- Doing well- no NSAIDs needed APS Inj | 14 | 12 |
| 11/30/18 | 12y | N | Bilateral Stifles 1.5ml each | Arthritis- Doing well, no NSAIDs- As of 02/07/2020 no APS needed yet | 15 | 12 |
| 04/14/2017 | 7y | N | Bilateral Stifles 1.2ml each | 4/11/17 Partial Torn ACL- Doing well! No Sx needed | 16 | 13 |
| 05/01/2017 | 7y | N | Bilateral Stifles 1.1ml each | 04/17 Bilateral ACL Tears, ACL Sx 5/2017 Doing well | 17 | 14 |
| 07/01/2019 | 15m | S | Bilateral Hips 1.5ml each | Bilateral Hip Dysplasia-Rec FHO or ACT- ACT= doing great!! | 18 | 15 |
| 01/25/2019 | 9y | N | L Stifle .25ml, R Stifle .5ml | Torn Left ACL- Doing well No surgery | 19 | 16 |
| 04/17/2019 | 6y | F | Bilateral Stifles 1ml each | Bilateral Torn ACL-04/17/19 Right ACL Sx Doing well | 20 | 17 |
| 12/02/2019 | 2y | M | Bilateral Stifles 1.2ml each | Right Partially torn ACL- Needed repaired, Doing well | 21 | 18 |
| 12/10/2018 | 10y | S | Left Stifle 1ml | Left ACL Repair Sx- Doing well | 22 | 19 |
| 05/24/2019 | 8y | N | Bilateral Stifles 0.25ml each | Left ACL Repair Sx- Doing well | 23 | 20 |
| 09/02/2016 | 4y | N | Right Stifle 2.8ml | 08/31/16 Torn R ACL- Doing well | 24 | 21 |
| 06/26/2017 | 5y | N | Right Stifle 1.9ml | 5/30/17 began getting stiff again | 25 | 21 |
| 06/01/2018 | 6y | N | Right Stifle 2.0ml | Doing well | 26 | 21 |
| 06/03/2019 | 7y | N | Bilateral Stifles 1.25ml each | Not currently on NSAIDs and Doing great!! | 27 | 21 |
| 05/23/2017 | 2y | N | Right Stifle 2.6ml | Right ACL Surgery- Did well | 28 | 22 |
| 07/12/2019 | 11y | N | Bilateral Stifles 1.1ml each | 05/20/19 L ACL Repair w/ patellar tack, 7/19 not using leg- well now | 29 | 23 |
| 09/18/2017 | 4y | N | Bilateral Stifles 1.5ml each | 9/18/17 L ACL Repair- still limping 9/18 on NSAIDs and Tramadol | 30 | 24 |
| 05/10/2019 | 12y | S | Left Stifle 0.2ml, rest SQ L Stifle | 4/19 right part. tear w/ luxating patella,5/19 Left luxating patella | 31 | 25 |
| 05/24/2019 | 8y | N | Left Hip 1.4ml,Right Hip 1ml | LM for update, but no answer back | 32 | 26 |
| 05/29/2019 | 4y | N | L Stifle 1.5ml, R Stifle1.3ml | Left ACL Repair Sx- Doing well | 33 | 27 |
| 06/09/2017 | 7y | F | Bilateral Hips 1.1ml each | Arthritis - No improvement | 34 | 28 |
| 10/17/2016 | 8y | S | Bilateral Hips 1ml each | Advanced Arthritis- no improvement | 35 | 29 |
| 10/06/2017 | 9y | S | Bilateral Stifles 1ml each | DJD with joint mouse- did really well | 36 | 30 |
| 02/17/2017 | 6y | N | R Stifle joint and SQ in that area | 06/2016 TPLO Sx- did really well | 37 | 31 |
| 08/12/2019 | 12Y | N | Bilateral Stifles 1.1ml each | Left Stifle Bursitis- Doing well | 38 | 32 |
| 07/21/2014 | 5y | S | Right Hip 1ml, Right Stifle 1ml | Right ACL Repair- NSAIDs PRN- some improvement | 39 | 33 |
| 05/03/2016 | 10y | S | Left Stifle 2ml | DJD Left Stifle- Did great!! | 40 | 34 |
| 11/07/2019 | 7y | N | Right stifle 3ml | TPLO Surgery Right Stifle, Doing well | 41 | 35 |
| 11/14/2019 | 7y | S | Bilateral Stifles 1ml each | Left ACL Repair Sx- Doing well | 42 | 36 |
| 07/31/2019 | 6y | S | Bilateral Stifles 1.2ml each | Right ACL Repair- Doing well | 43 | 37 |
| 03/06/2018 | 10y | S | Bilateral Hips 1.1ml each | Bilateral DJD in Hips- Did Great! | 44 | 38 |
| 05/22/2018 | 4y | N | Bilateral Stifles 1.3ml each | Bilateral TPLO Sx- Doing great!! | 45 | 39 |
| 04/11/2017 | 5y | S | Bilateral Stifles 1.7ml each | Arthritis- slow to improve | 46 | 40 |
| 06/12/2017 | 11y | S | Right Stifle and Right Hip | Arthritis and Right Torn ACL- Doing well, no amounts noted | 47 | 41 |
| 06/21/2019 | 24m | S | Bilateral Stifles 1.5ml each | Right ACL Repair- Doing well | 48 | 42 |
| 10/21/2019 | 7y | M | Bilateral Stifles 1ml each | Right ACL Repair- a lot of post op complications | 49 | 43 |
| 02/11/2019 | 7y | N | Bilateral Stifles 1.5ml each | Right ACL Repair- Doing Great! | 50 | 44 |
| 01/11/2016 | 11y | N | Right Hip 3ml | Severe Arthritis- not much improvement | 51 | 45 |
| 03/20/2017 | 2y | S | Left Stifle 1ml,Left Hip 1ml | Left ACL Repair Sx- Doing well | 52 | 46 |
| 01/09/2019 | 6y | S | Left Stifle 1ml, Left Stifle .5ml | Right ACL Repair Sx- Doing well | 53 | 47 |
| 10/09/2019 | 6y | S | Bilateral Stifles 1ml each | Left TPLO- post op swelling with fluid- not much improvement | 54 | 47 |
| 06/05/2019 | 2y | S | Bilateral Stifles 1.25ml each | Torn Left ACL- No surgery-LM for update, no answer back | 55 | 48 |
| 03/06/2019 | 5y | S | Bilateral Stifles 1ml each | Bilateral Torn ACL- Left Sx on 3/6/19, 2 months until improved | 56 | 49 |
| 05/29/2019 | 10y | N | Bilateral Stifles 1.25ml each | Torn Bilateral ACLs- no surgery and doing well | 57 | 50 |
| 03/10/2014 | 13y | S | Bilateral Hips 1.2ml each | Arthiritis Bilateral Hips- no real improvement | 58 | 51 |
| 05/20/2019 | 2y | N | Bilateral Stifles 1.1ml each | R Partial Tear ACL= No surgery and only on NSAIDs PRN Doing well | 59 | 52 |
| 02/25/2019 | 2y | S | Bilateral Stifles 1.25ml each | R Torn ACL= TPLO 4/2016, L Torn ACL 2/2019 Doing well | 60 | 53 |
| 02/13/2019 | 5y | S | Bilateral Stifles 0.5ml each | Bilateral Luxating Patella with arthritis- doing well 2ml APS total | 61 | 54 |
| 09/09/2019 | 5y | N | Bilateral Stifles 1ml each | Right Torn ACL- Doing well! 2.5ml APS total | 62 | 55 |
| 04/25/2017 | 12y | S | Right Hip 1ml,Left Stifle .3ml | Degenerative Joint Disease Left Stifle Did Well | 63 | 56 |
| 01/02/2019 | 6y | N | Bilateral Stifles 1.4ml each | Left ACL Repair Sx- Doing well | 64 | 57 |
| 10/09/2017 | 8y | S | Bilateral Stifles 1.3ml each | Left Torn ACL- no surgery- complications= euth | 65 | 58 |
| 10/23/2019 | 5y | N | R Stifle 1.3ml, L Stifle 1.5ml | Torn Right ACL- slow recovery- now doing well | 66 | 59 |
| 06/02/2017 | 9y | M | Right Elbow 2ml | Arthiritis Right Elbow- Did very well | 67 | 60 |
| 04/12/0219 | 10y | S | Bilateral Stifles 1ml each | Partial Torn ACL- Surgery 4/24 Doing well | 68 | 61 |
| 05/01/2018 | 8y | S | Bilateral Stifles 1.3ml each | Bilateral ACL Tear- TPLO Right stifle- Doing well no surgery for L | 69 | 62 |
| 01/09/2019 | 5y | N | Bilateral Stifles 1.2ml each | Right ACL Repair- did well | 70 | 63 |
| 02/12/2020 | 6y | N | Left Stifle 0.7ml, Left hip 1.3ml | TPLO Surgery Left Stifle, Doing well so far | 71 | 63 |
| 09/04/2019 | 7y | N | Right Stifle 1ml,Left Stifle 1.1ml | Right Torn ACL- Band loosened, owner declined repair and still limps | 72 | 64 |
| 02/26/2016 | 6y | N | Left Stifle 2.2ml | Doing Great!! | 73 | 65 |
| 03/29/2019 | 9y | N | Bilateral Stifles 1ml each | Torn Right ACL- now doing well | 74 | 66 |
| 09/04/2015 | 6y | S | Bilateral Hips 1.1ml each | Bilateral Arthritis in hips- Doing well | 75 | 67 |
| 10/14/2019 | 3y | S | Left Stifle .75ml,Right Stifle 1ml | Torn Left ACL- No surgery and doing well | 76 | 68 |
| 10/03/2019 | 12y | N | Bilateral Stifles- no amount | L ACL surgery3/2016, R ACL Surgery 10/2019 Doing well | 77 | 69 |
| 11/16/2015 | 10y | N | Right Hip 2.1ml | Severe Arthritis- not much improvement | 78 | 70 |
| 10/03/2017 | 7y | N | Bilateral Stifles 1.25ml each | Right ACL Surgery and doing well | 79 | 71 |
| 11/21/2018 | 3y | S | Bilateral Stifles 1ml each | Right Torn ACL Surgery and doing well | 80 | 72 |
| 07/31/2019 | 15y | S | Bilateral Stifles 0.5ml each | 10/2018 Right ACL Surgery- limping= rec. APS Doing well 2.4ml total | 81 | 73 |
| 03/24/2014 | 12y | N | Left Stifle 3ml | DJD in Left stifle | 82 | 74 |
| 11/13/2015 | 6y | S | Bilateral Stifles 1ml each | Arthritis Doing well | 83 | 75 |
| 08/26/2015 | 6y | S | RShoulder 1.3ml,LShoulder 1.2ml | Arthritis Doing well | 84 | 75 |
| 06/10/2014 | 5y | S | Left Stifle 4ml | Arthritis Doing well | 85 | 75 |
| 04/08/2014 | 8y | S | Bilateral Hips 1ml each | Arthritis Doing well | 86 | 76 |
| 12/14/2018 | 10y | S | Bilateral Stifles- No amount | Right ACL Surgery- Doing well | 87 | 77 |
| 09/16/2019 | 8y | S | Bilateral Stifles 1.2ml each | Left ACL Repair Sx- Doing well | 88 | 78 |
| 01/08/2016 | 10y | N | Bilateral Hips 1.5ml each | DJD in both hips- No improvement | 89 | 79 |
| 07/27/2016 | 10y | N | Bilateral Hips 1.5ml, .3 L Carpus | Severe Arthritis and Neuropathy- helped comfort level, not neuro | 90 | 80 |
| 03/02/2018 | 8y | N | Bilateral Hips 1ml each | Arthritis- Doing well | 91 | 81 |
| 03/13/2017 | 14y | N | Right Stifle Joint 1ml and 1ml SQ | Right Torn ACL- No surgery and doing well | 92 | 82 |
| 03/13/2017 | 3y | S | Left Hip 2ml | Left Hip laxity- did help | 93 | 83 |
| 12/11/2019 | 8y | N | Bilateral Stifles 1ml each | DJD Bilateral Stifles- Doing well | 94 | 84 |
| 3/24/2017 | 9y | S | Right Stifle- no amount | ACL Surgery 2009, Trochlear Groove Surgery 2009 | 95 | 85 |
| 04/12/2017 | 6y | S | Left Stilfe 2.5ml | Torn Left ACL- Surgery- Doing well | 96 | 86 |
| 01/15/2018 | 6y | S | Bilateral Stifle 1.75ml each | Right ACL surgery- doing well | 97 | 87 |
| 10/07/2019 | 4y | N | Right Elbow 1ml | Right Elbow Arthritis- doing well 2.5ml total | 98 | 88 |
| 08/05/2019 | 5y | S | Bilateral Stifles 1ml each | Right ACL surgery- doing well | 99 | 89 |
| 03/25/2019 | 10y | S | L Stifle 0.5ml, R Stifle 0.6ml | Left Torn ACL Surgery- Doing well | 100 | 90 |
| 05/20/2019 | 3y | N | Bilateral Stifles 1ml each | Right ACL surgery- doing well | 101 | 91 |
| 06/24/2019 | 13y | N | R stifle 1ml, L Stifle 0.5ml | Torn Right ACL Doing well | 102 | 92 |
| 04/19/2018 | 3y | N | Bilateral Stifles- No amount | Left TPLO doing well | 103 | 93 |
| 08/07/2019 | 2y | S | Bilateral Stifles 1ml each | Left ACL Repair Sx- Doing well | 104 | 94 |
| 11/14/2019 | 16m | N | Bilateral Stifles 1.1ml each | Right ACL Surgery- Doing well | 105 | 95 |
| 05/24/2017 | 11y | N | Right Hip 2.6ml | Right hip arthritis 9/2017 Right torn ACL | 106 | 96 |
| 10/01/2019 | 3y | S | L Stifle 1.5ml, R Stifle 1ml | Left ACL Repair Sx- Doing well | 107 | 97 |
| 06/26/2019 | 3y | S | Bilateral Stifles 0.75ml each | Left ACL Repair Sx- Doing well 2.5ml total | 108 | 98 |

1. O'shaughnessey K, Matuska A, Hoeppner J, et al. Autologous protein solution prepared from the blood of osteoarthritic patients contains an enhanced profile of anti‐inflammatory cytokines and anabolic growth factors. *Journal of orthopaedic research : official publication of the Orthopaedic Research Society.* 2014;32(10):1349-1355.
